# Supplementary material
Source: PubMed Central journal article supplement (PMC9903673)
Supplement: mmc1.pdf [file mmc1.pdf]

**Cell Genomics, Volume 2**

**Supplemental information**

**Karyotype engineering reveals spatio-temporal  
control of replication firing and gene contacts**

**Luciana Lazar-Stefanita, Jingchuan Luo, Remi Montagne, Agnes Thierry, Xiaoji Sun, Guillaume Mercy, Julien Mozziconacci, Romain Koszul, and Jef D. Boeke**

**Title:** Karyotype engineering reveals spatio-temporal control of replication firing and gene contacts

**Authors:** Luciana Lazar-Stefanita<sup>1,2,3</sup>, Jingchuan Luo<sup>1</sup>†, Remi Montagne<sup>2</sup>†, Agnes Thierry<sup>2</sup>, Xiaoji Sun<sup>1</sup>, Guillaume Mercy<sup>2</sup>, Julien Mozziconacci<sup>4</sup>, Romain Koszul<sup>2\*</sup>, Jef D. Boeke<sup>1,5\*</sup>

†, These authors contributed equally

\*, Corresponding authors: RK [romain.koszul@pasteur.fr](mailto:romain.koszul@pasteur.fr); JDB [jef.boeke@nyulangone.org](mailto:jef.boeke@nyulangone.org)

### **Supplemental Figures and Tables:**

Supplemental Figures 1-7, related to Main Figure 1. Nuclear organization and function of mega-sized chromosomes in *S. cerevisiae*.

Supplemental Figures 8-9, related to Main Figure 2. Contact analysis of repeat-enriched (flocculin) genes in megachromosomes.

Supplemental Figures 10-15, related to Main Figure 3. S-phase progression and DNA replication of megachromosomes.

Supplemental Figures 16-18, related to Main Figure 4. Structural reorganization of megachromosomes during cell division.

Supplemental Table 6, related to Main Figures 1, 2 and 4. Hi-C libraries.

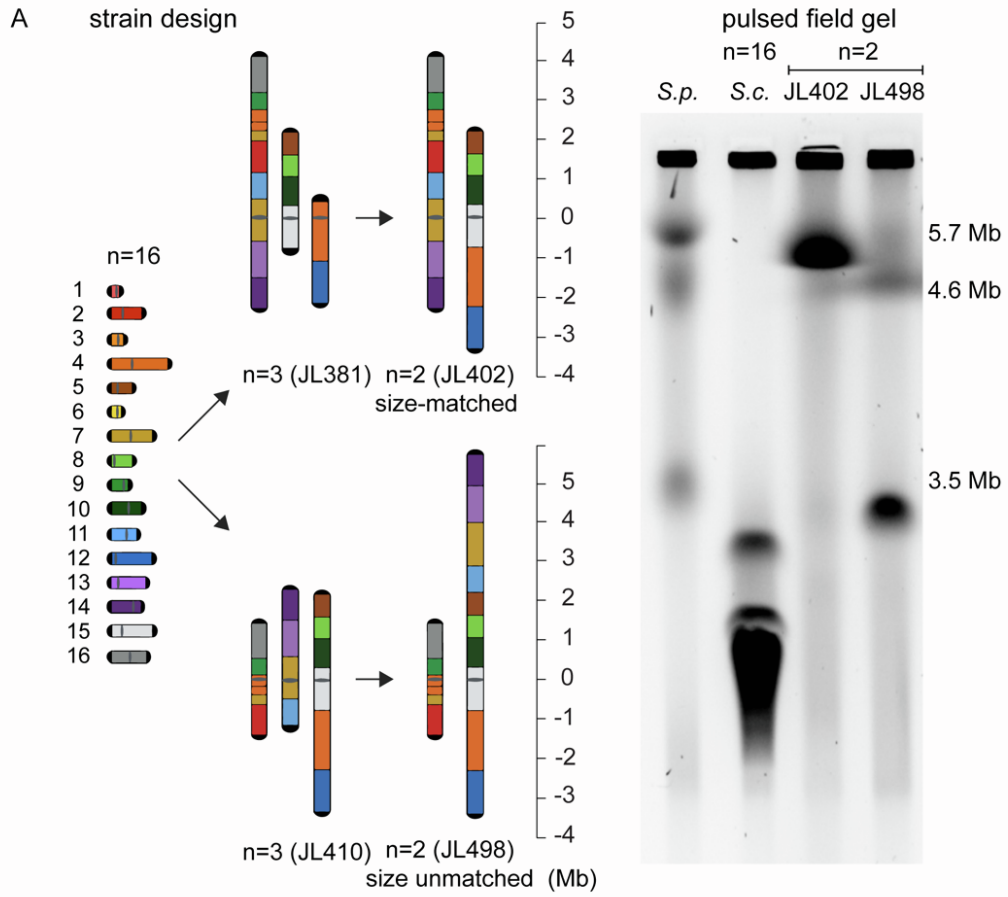

**B growth assays**

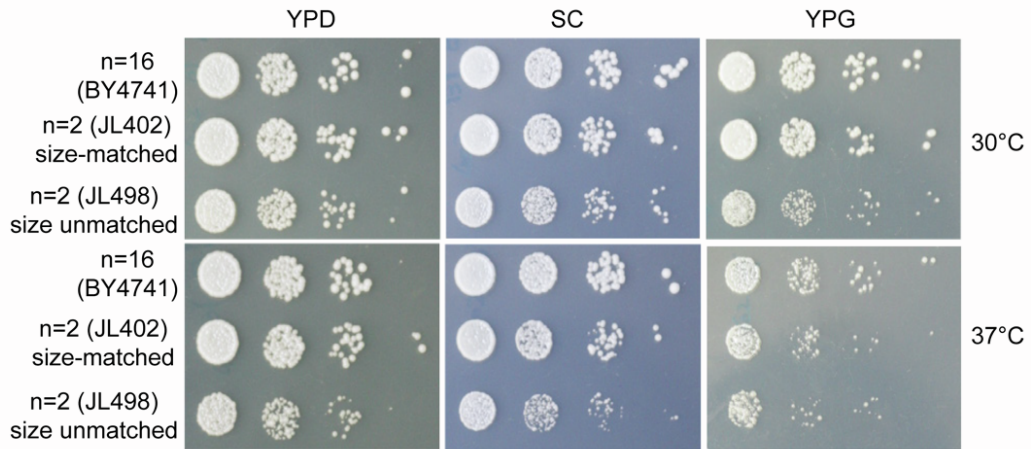

**Figure S1, related to Main Figure 1. Design of size-matched and unmatched megachromosomes.**

(A) Design of the megachromosomes. The diagram on the left illustrates the arrangement of the 16 native chromosomes into  $n=2$  (JL402 size-matched and JL498 size unmatched) and the corresponding  $n=3$  intermediate strains used in this study. The 16 native chromosomes are uniquely colored and ordered numerically, while the fused chromosomes are alphabetically ordered (A, B and C). Length of chromosome arms is indicated as a function of distance from the centromere position (Mb). On the right, pulsed-field gel electrophoresis with *S. pombe* (*S.p.*) chromosomal DNA as a ladder followed by *S.c.*, *S. cerevisiae*,  $n=2$  JL402 size-matched and  $n=2$  JL498 unmatched (for  $n = 3$  strains refer to Luo et al.<sup>17</sup>). (B) Growth assay: serial dilutions of  $n=16$  (BY4741) and  $n=2$  (JL402 and JL498) on YPD (Yeast Extract–Peptone–2%Dextrose), SC (synthetic complete) and YPG (Yeast Extract–Peptone–3% Glycerol) medium at 30°C and 37°C.

n=2 size unmatched (JL498) vs. n=16 (BY4741)

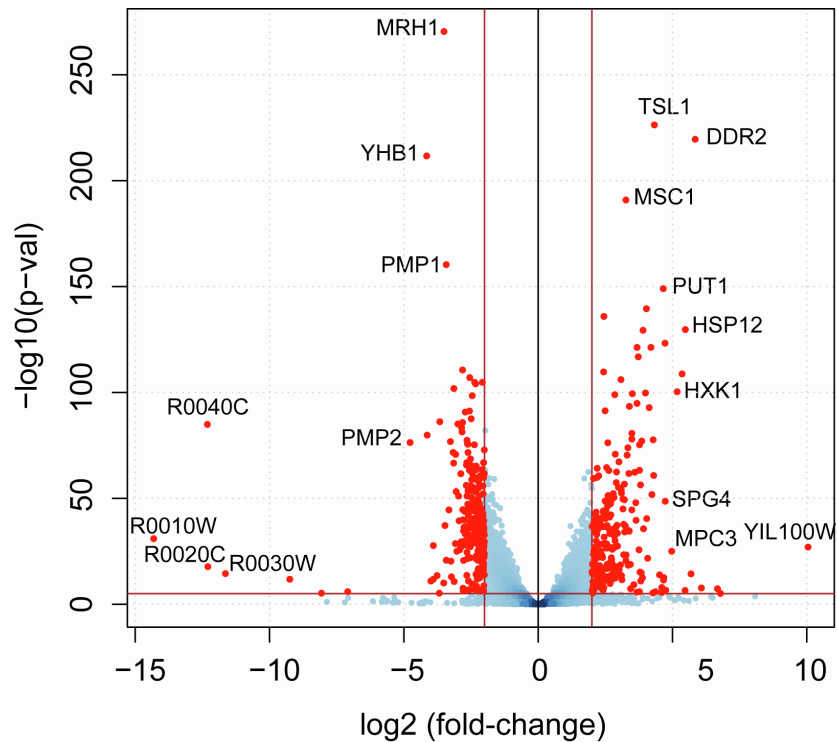

**Figure S2, related to Main Figure 1. Transcriptomics of n=2 with unmatched megachromosomes.**

Volcano plot of RNA-seq data that compares the transcriptomes of n=16 and n=2 JL498 (for n = 2 JL402 strain refer to Luo et al.<sup>30</sup>). Red dots indicate genes whose expression was significantly different in the n = 2 strain compared to the n = 16 strain (log<sub>2</sub> fold-change > 2 or < -2 and *P*-value < 1E10<sup>-5</sup>).

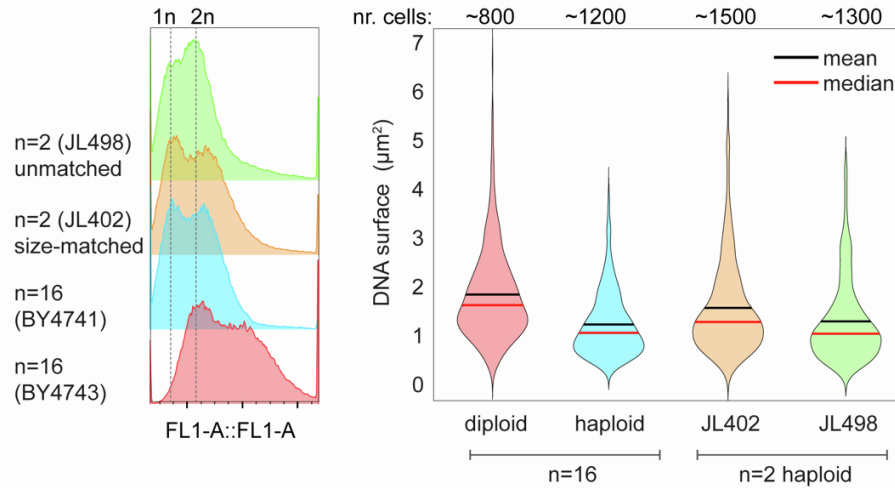

| DNA surface ( $\mu\text{m}^2$ )                | n=16 haploid (BY4741) |      | n=16 diploid (BY4743) |                     | n=2 size-matched haploid (JL402) |                     |                     | n=2 unmatched haploid (JL498) |       |      |
|------------------------------------------------|-----------------------|------|-----------------------|---------------------|----------------------------------|---------------------|---------------------|-------------------------------|-------|------|
|                                                | R1                    | R2   | R1                    | R2                  | R1                               | R2                  | R3                  | R1                            | R2    | R3   |
| MED ( $\mu\text{m}^2$ )                        | 1.11                  | 1.15 | 1.68                  | 1.68                | 1.34                             | 1.46                | 1.46                | 1.10                          | 1.27  | 1.17 |
| MX ( $\mu\text{m}^2$ )                         | 1.28                  | 1.35 | 1.90                  | 1.99                | 1.62                             | 1.69                | 1.73                | 1.35                          | 1.56  | 1.43 |
| DNA surface increase relative to n=16 (BY4741) | %                     |      | 50%                   | 47%                 | 26%                              | 25%                 | 28%                 | 0%                            | 15%   | 6%   |
|                                                | p-val                 |      | 4.36 <sup>-28</sup>   | 9.09 <sup>-22</sup> | 2.56 <sup>-05</sup>              | 6.91 <sup>-08</sup> | 1.27 <sup>-13</sup> | 0.65                          | 0.013 | 0.15 |

MED ( $\mu\text{m}^2$ ) = median      MX ( $\mu\text{m}^2$ ) = mean      R(n<sup>o</sup>) = independent replicates  
 Summary measurements Supplemental Table 2a

representative images of DNA staining with SYTOX Green (max intensity of Z projections):

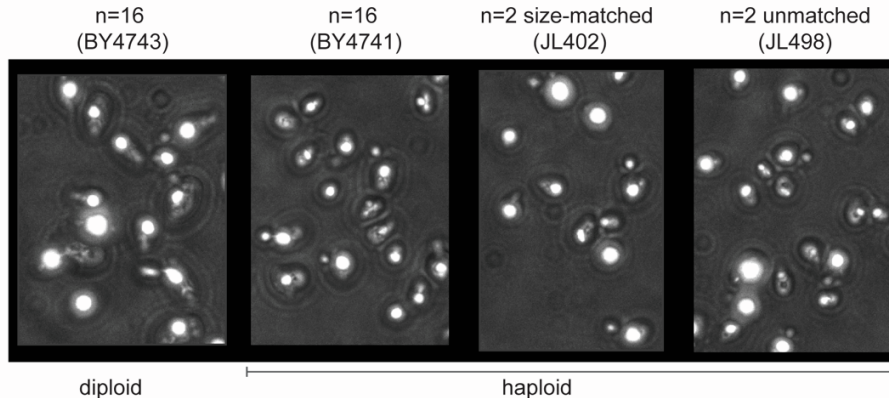

**Figure S3, related to Main Figure 1. DNA content and surface in yeasts with n=2 megachromosomes.**

Flow cytometry histograms of DNA content and microscopy on SYTOX Green-stained cells of n=16 (BY4743 and BY4741) and n=2 (JL402 and JL498) strains. Violin plots display mean and median values of the DNA surface ( $\mu\text{m}^2$ ) in haploid (n=16 and n=2) and diploid (n=16 BY4743, positive control for surface increase) strains. Summary table of DNA surface ( $\mu\text{m}^2$ ) measurements for each independent replicate (R#) showing: their relative (%) increments as compared to n=16 haploid and *P*-values obtained from K-S test. Bottom panels: representative images of GFP excited cells used above.

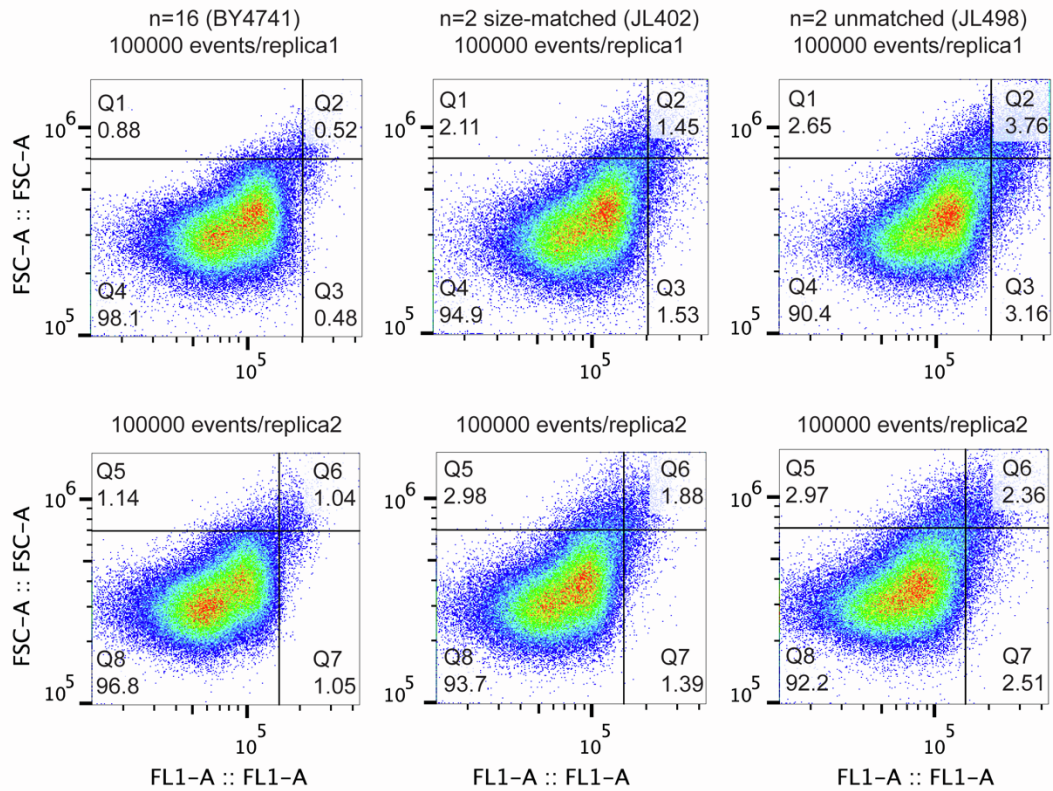

**Figure S4, related to Main Figure 1. N=2 yeasts display a mild excess in DNA content.**

Flow cytometry of haploid cell populations (100,000 events). x- and y-axis indicate cell size (FSC) and DNA content (FL1) respectively. Note that both n=2 strains display a slight increase in number of cells with an excess of DNA content and/or size relative to n=16.

representative images of fluorescent labeling of the nuclear envelope (Nup49-mScarlet)

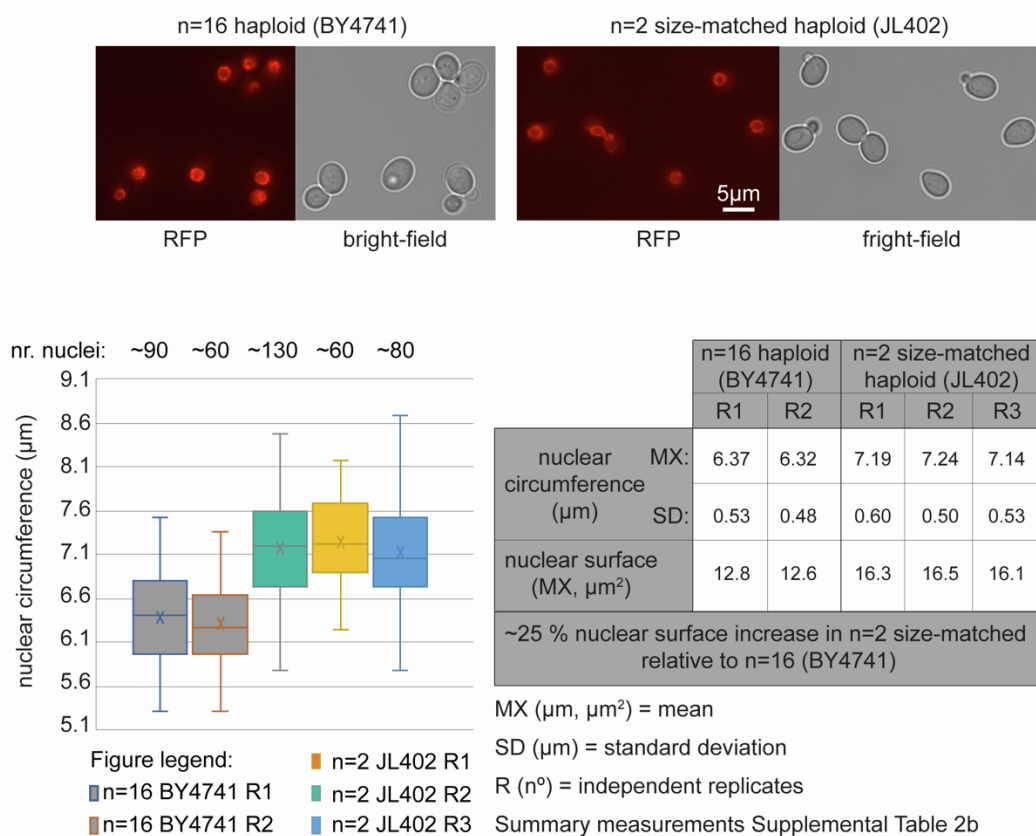

**Figure S5, related to Main Figure 1. Nuclear size increases in n=2 with size-matched megachromosomes.**

Nuclear size in haploid cells of n=16 (BY4741) and n=2 size-matched (JL402) with Nup49 (nuclear pore protein) fluorescently tagged with mScarlet. Top panels: representative microscopy images. Bottom panels: mean (MX) and standard deviation (SD) of nuclear circumference (μm) and surface (μm<sup>2</sup>).



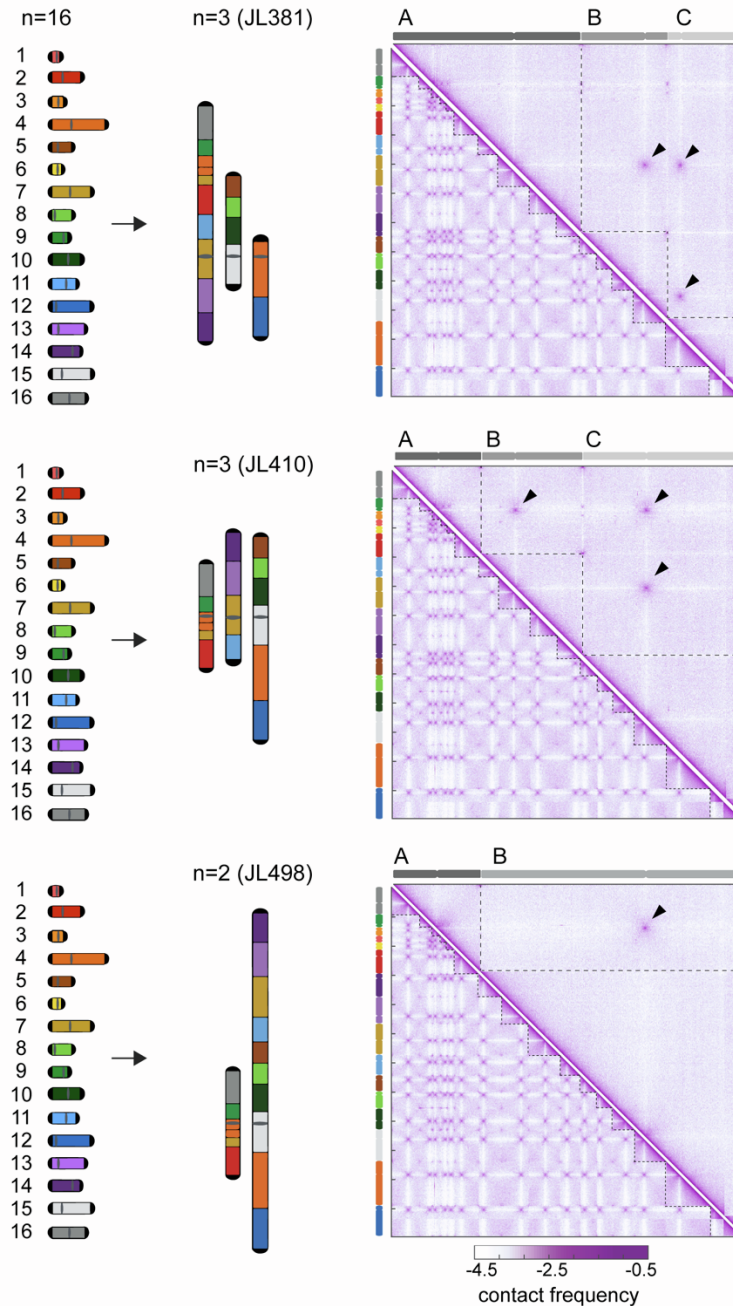

**Figure S6, related to Main Figure 1. 3D organization (Hi-C) of megachromosomes.**

Contact maps of  $n=16$ ,  $n=3$  and  $n=2$  (JL498, unmatched size). Diagrams on the left illustrate the design of each fusion while panels on the right show the corresponding Hi-C contact maps. Top left maps were generated by aligning  $n=3$  and  $n=2$  reads to reference sequences containing either 3 or 2 megachromosomes (A, B and/or C, atop the map). Bottom left maps show all 16 native chromosomes in  $n=16$ . Chromosomes on the Hi-C maps (5 kb-binned) appear underlined by dotted lines. Black arrowheads point at inter-pericentromeric contacts. Violet to white color scale reflects high to low contact frequencies (log10).

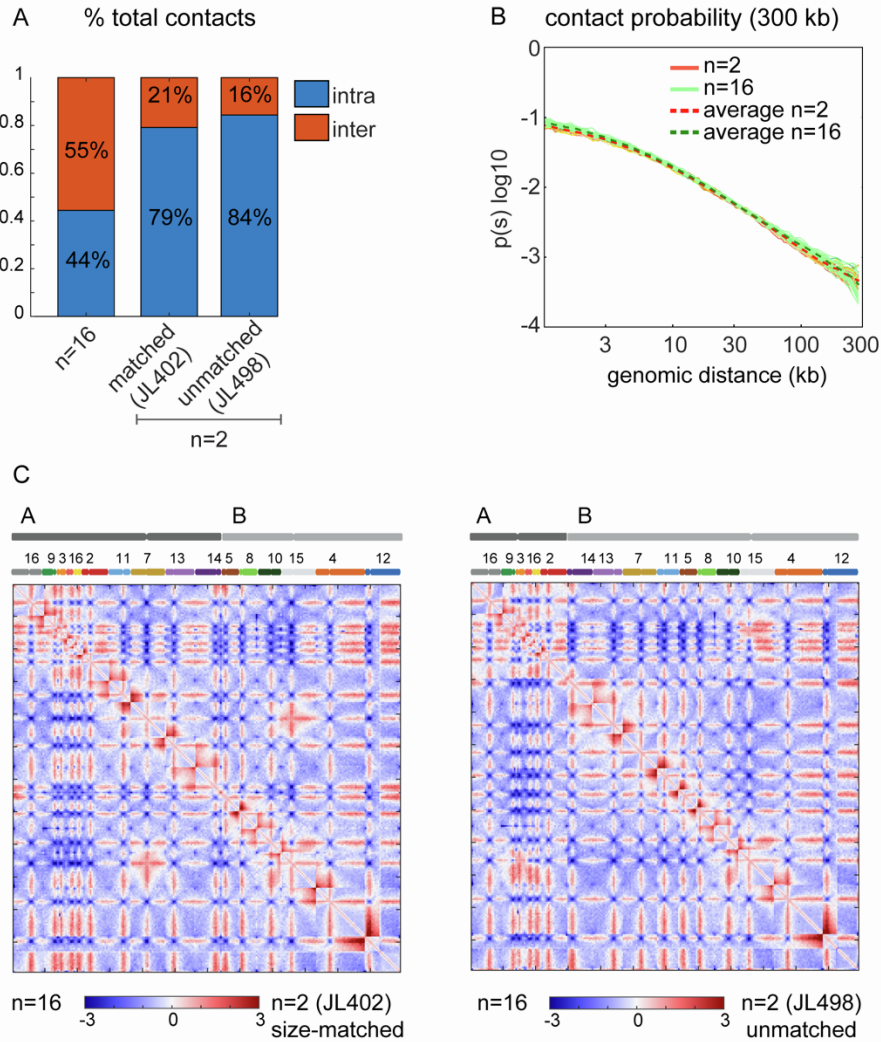

**Figure S7, related to Main Figure 1. Contact analysis of megachromosomes.**

(A) Quantitative bar chart showing the relative (%) of intra- and inter-chromosome contacts in n=16 and n=2 (JL402 and JL498). (B) Contact probability,  $p(s)$ , spanning 300 kb genomic windows in n=16 and n=2, dash line represents the average decay of the intrachromosomal contact frequency  $p$  between loci with respect to their genomic distance  $s$ . (C) Log2-ratios between contact maps (50kb-binned). Left map: n=16 vs. n=2 size-matched (JL402). Right map: n=16 vs. n=2 unmatched (JL498). Blue to red color scale reflects the enrichment in contacts in n=2 with respect to n=16 ( $\log_2$ ). Chromosomes are annotated atop the maps.

Average sequence identity in the 10 kb *FLO*-flanking regions

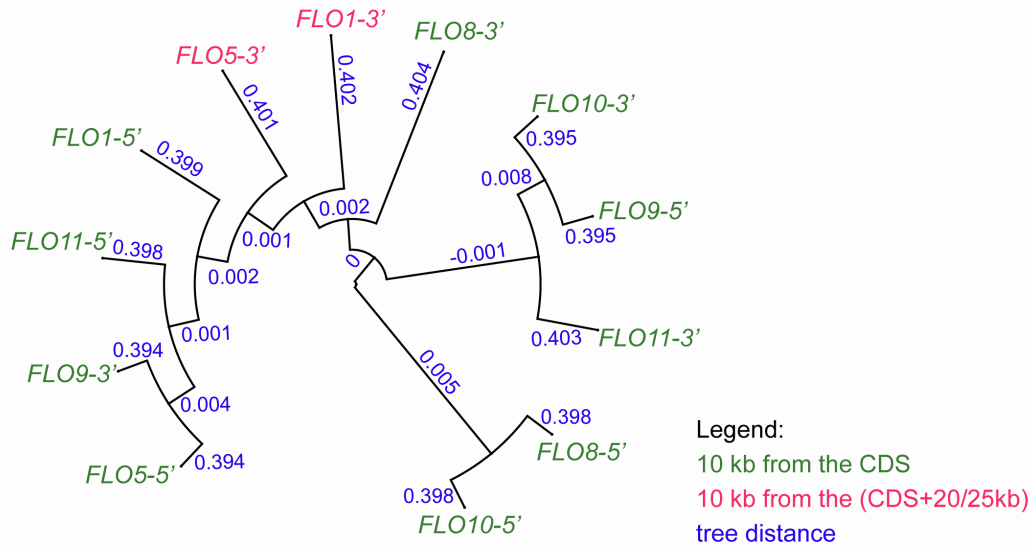

Percent Identity Matrix - created by Clustal 2.1

|                 |               |               |               |               |               |               |               |               |               |               |               |               |
|-----------------|---------------|---------------|---------------|---------------|---------------|---------------|---------------|---------------|---------------|---------------|---------------|---------------|
| <i>FLO10-5'</i> | <b>100.00</b> | 46.05         | 33.18         | 32.64         | 33.35         | 34.26         | 33.02         | 33.12         | 34.78         | 33.57         | 33.59         | 33.72         |
| <i>FLO8-5'</i>  | 46.05         | <b>100.00</b> | 32.55         | 33.72         | 33.51         | 33.55         | 32.24         | 33.53         | 35.07         | 34.11         | 34.11         | 34.63         |
| <i>FLO11-3'</i> | 33.18         | 32.55         | <b>100.00</b> | 40.21         | 41.78         | 32.70         | 32.99         | 32.95         | 32.65         | 32.36         | 32.32         | 33.29         |
| <i>FLO9-5'</i>  | 32.64         | 33.72         | 40.21         | <b>100.00</b> | 45.23         | 32.17         | 32.56         | 32.60         | 32.23         | 32.15         | 33.04         | 32.78         |
| <i>FLO10-3'</i> | 33.35         | 33.51         | 41.78         | 45.23         | <b>100.00</b> | 33.45         | 32.54         | 33.48         | 33.45         | 32.91         | 33.61         | 33.74         |
| <i>FLO8-3'</i>  | 34.26         | 33.55         | 32.70         | 32.17         | 33.45         | <b>100.00</b> | 37.84         | 36.61         | 37.09         | 36.93         | 37.40         | 37.14         |
| <i>FLO1-3'</i>  | 33.02         | 32.24         | 32.99         | 32.56         | 32.54         | 37.84         | <b>100.00</b> | 37.70         | 37.45         | 37.98         | 37.91         | 37.86         |
| <i>FLO5-3'</i>  | 33.12         | 33.53         | 32.95         | 32.60         | 33.48         | 36.61         | 37.70         | <b>100.00</b> | 38.56         | 37.72         | 38.08         | 38.51         |
| <i>FLO1-5'</i>  | 34.78         | 35.07         | 32.65         | 32.23         | 33.45         | 37.09         | 37.45         | 38.56         | <b>100.00</b> | 38.77         | 40.17         | 40.16         |
| <i>FLO11-5'</i> | 33.57         | 34.11         | 32.36         | 32.15         | 32.91         | 36.93         | 37.98         | 37.72         | 38.77         | <b>100.00</b> | 40.67         | 41.36         |
| <i>FLO9-3'</i>  | 33.59         | 34.11         | 32.32         | 33.04         | 33.61         | 37.40         | 37.91         | 38.08         | 40.17         | 40.67         | <b>100.00</b> | 45.81         |
| <i>FLO5-5'</i>  | 33.72         | 34.63         | 33.29         | 32.78         | 33.74         | 37.14         | 37.86         | 38.51         | 40.16         | 41.36         | 45.81         | <b>100.00</b> |

**Figure S8, related to Main Figure 2. Sequence identity in the flocculin flanking genes.**

Tree diagram and identity matrix illustrate the relative sequence identity between all 10kb regions adjacent to the CDS (CoDing Sequence) of each *FLO* gene. A ~35% sequence identity was obtained using the multiple alignment option in Clustal Omega.

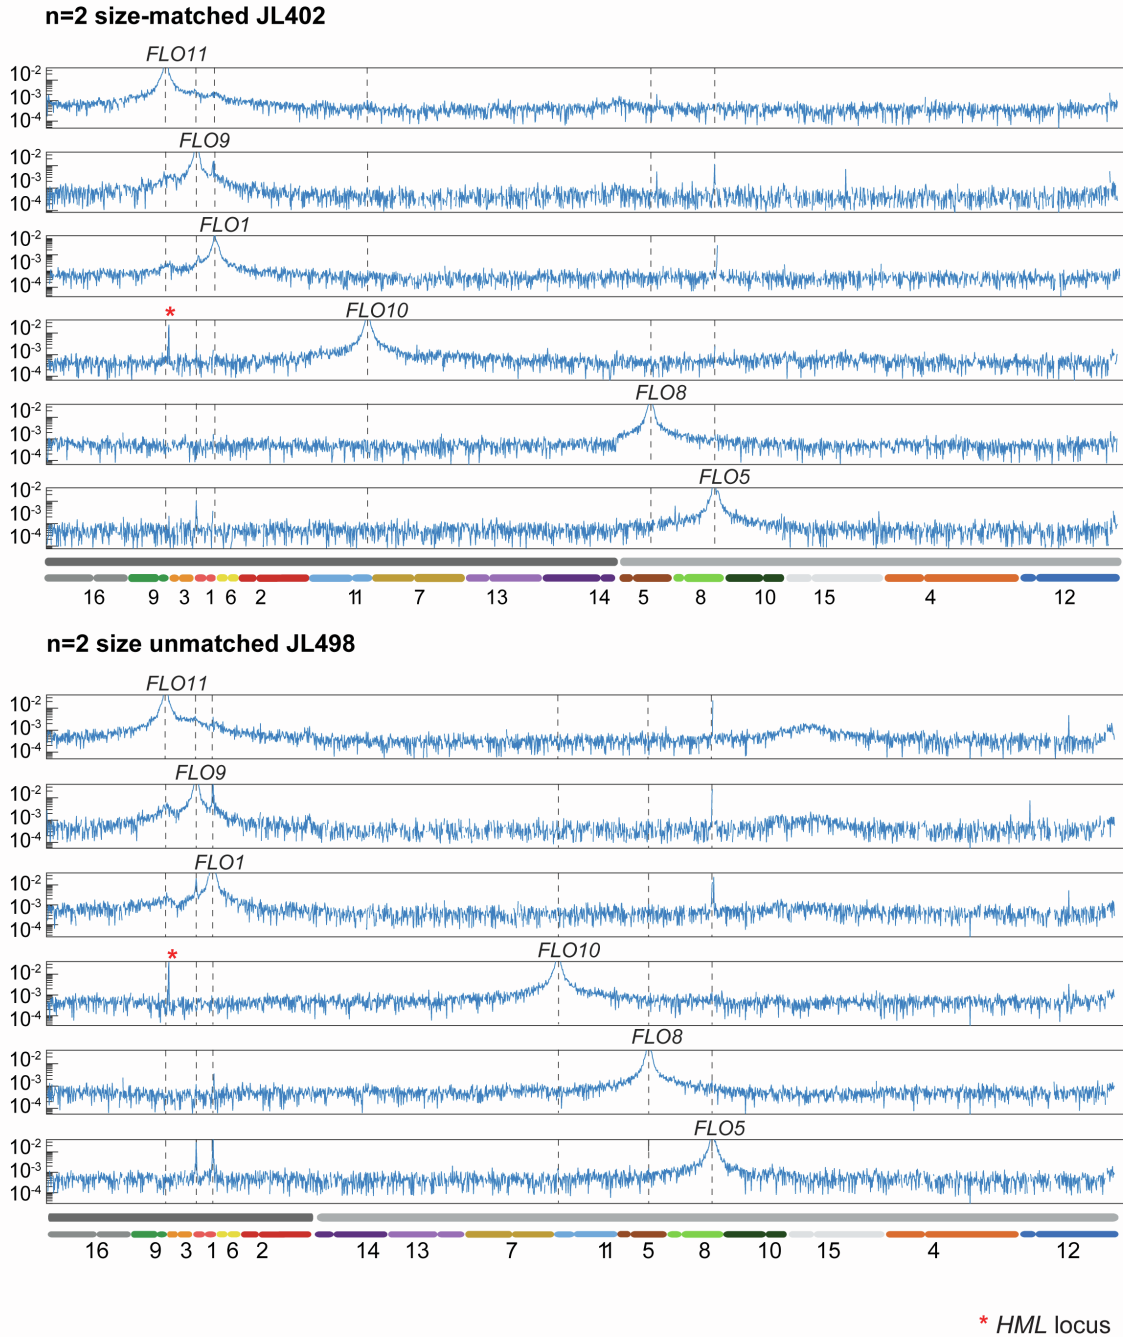

**Figure S9, related to Main Figure 2. 4C-like profiles with *FLO* genes as viewpoints.** Each plot shows the contact pattern of a 15 kb window, centered on a single *FLO* locus in n=2 size-matched (JL402 top panels) and n=2 size-unmatched (JL498 bottom panels). Red star indicates *HML* locus.

Supplemental Figure 10

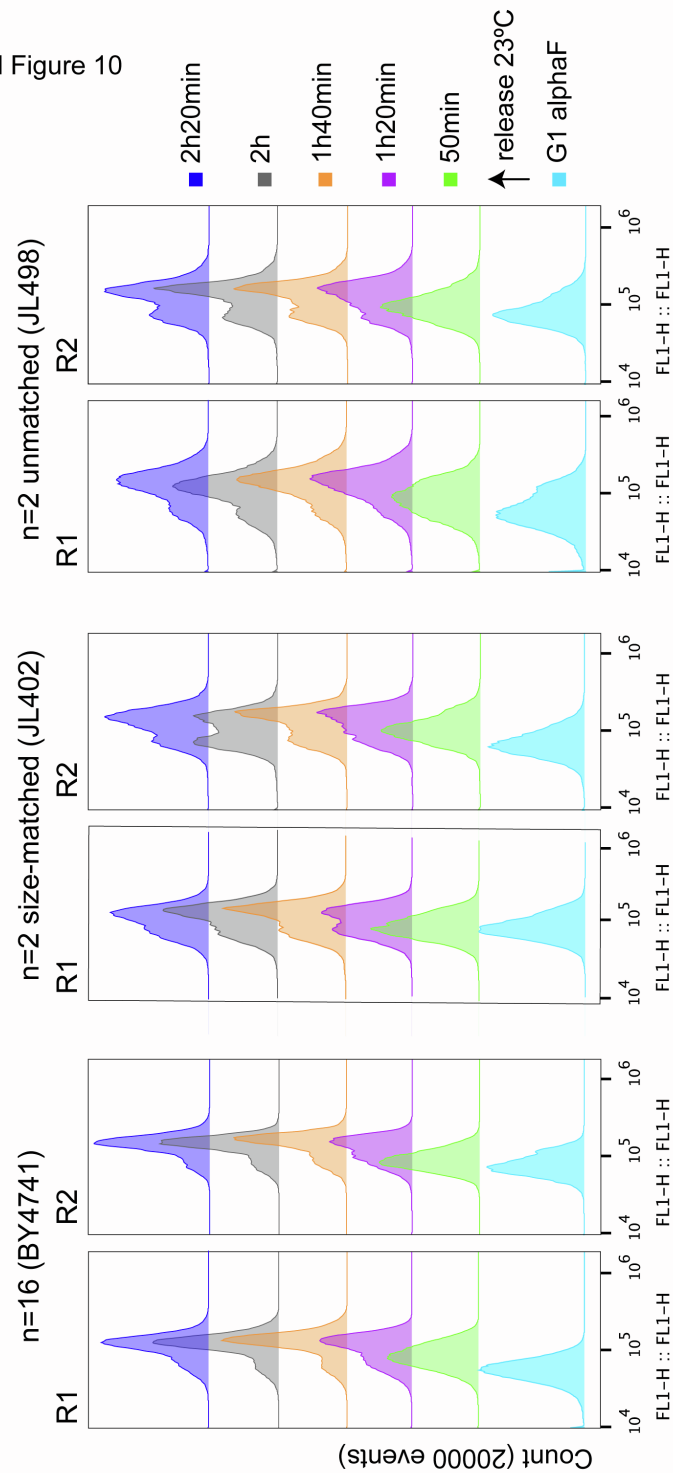

**Figure S10, related to Main Figure 3. S-phase progression in n=16 vs. n=2 (JL402 size-matched and JL498 unmatched) strains.**

Flow cytometry profiles of DNA content of cells synchronized in G1 with  $\alpha$ -factor and release in S phase at 23°C. Two independent replicates are shown (R1 and R2) for each strain.

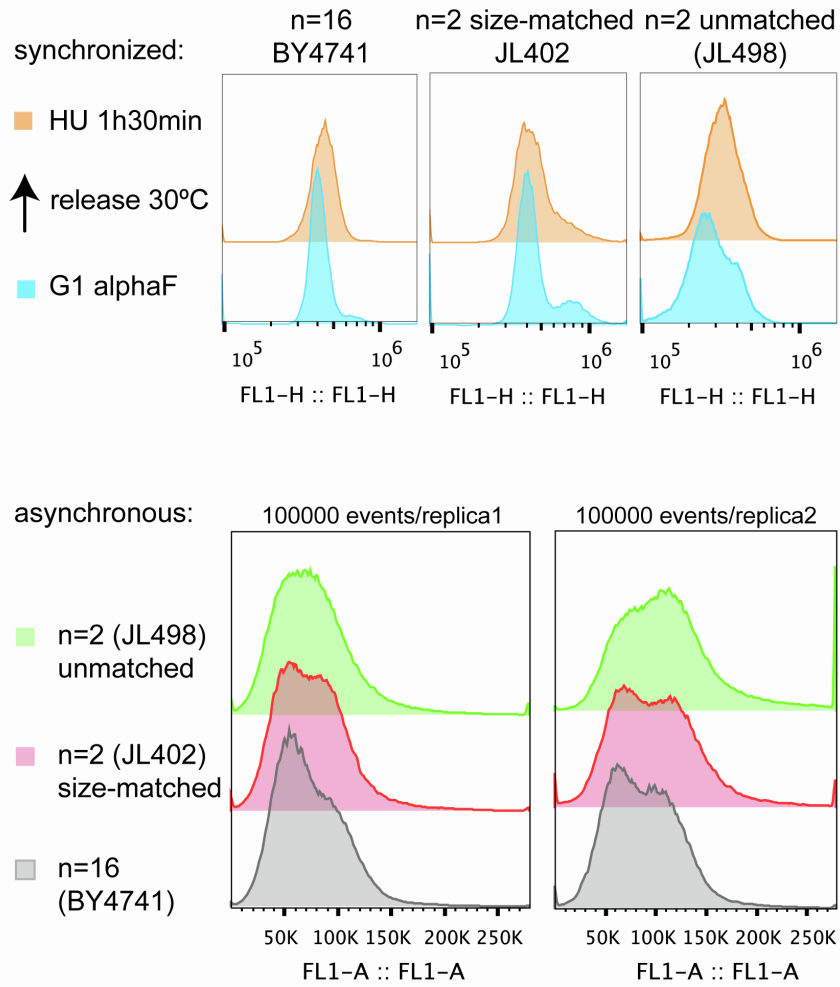

**Figure S11, related to Main Figure 3. G1 and S-phase synchronizations of samples used for computing replication firing profiles in n=16 and n=2 (JL402 and JL498).**

Top panels: DNA content of cells synchronized in G1 with  $\alpha$ -factor, released and arrested in early S phase with HU. Bottom panels: DNA content of asynchronous cell populations.

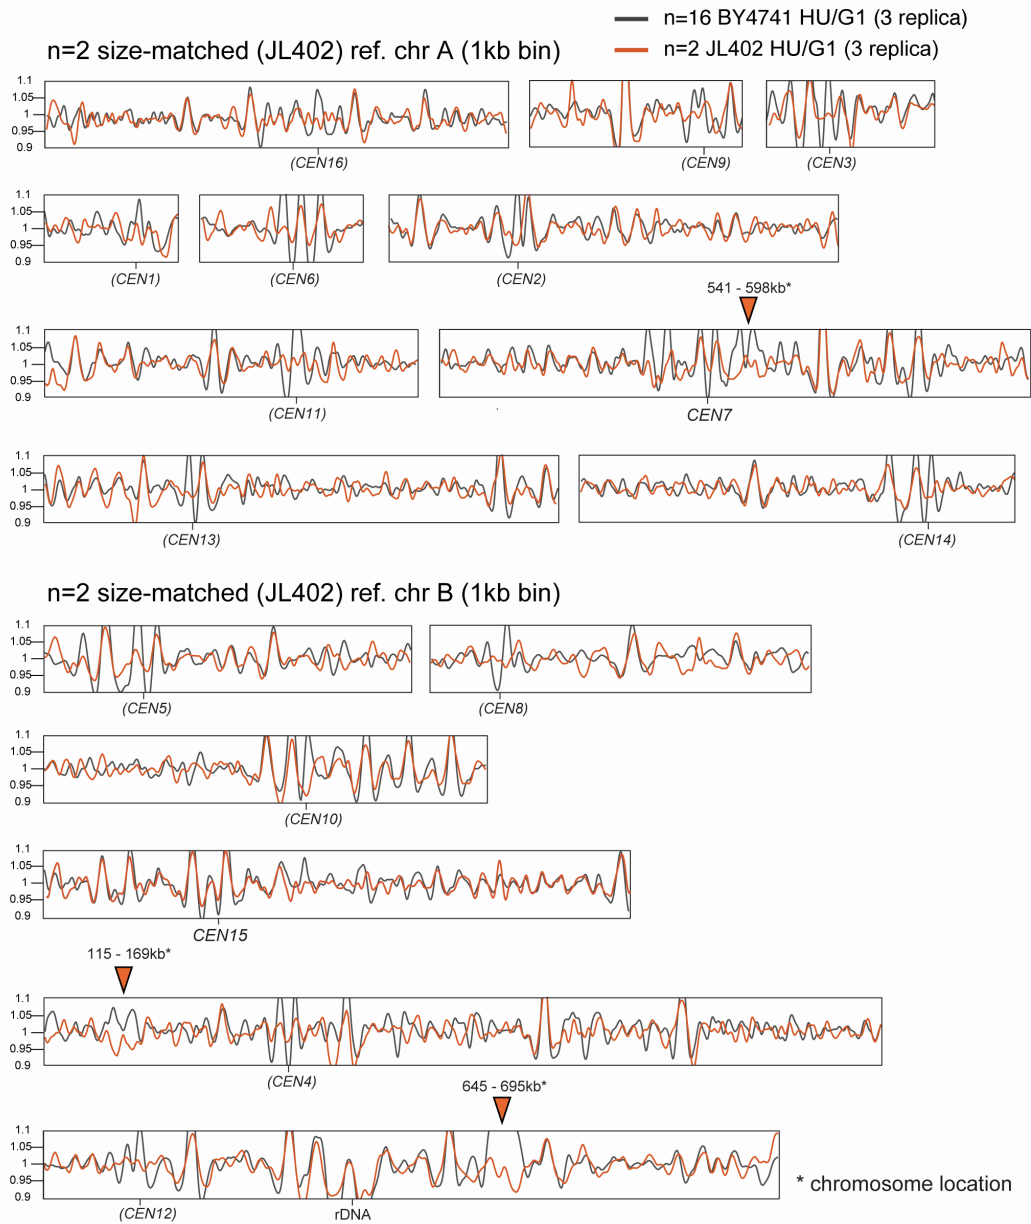

**Figure S12, related to Main Figure 3. Comparison of origin firing profiles in n=2 JL402 vs. n=16 BY4741.**

Each profile is the average representation of three independent replicates, showing the sequencing coverage ratio of S phase (HU) synchronized cells normalized on the G1 ( $\alpha$ -factor) non-replicating cells. Replication timing profiles (1kb-binned) of n=16 are shown in gray, while those of n=2 are in orange. Inactivated centromeres in n=2 are shown in brackets.

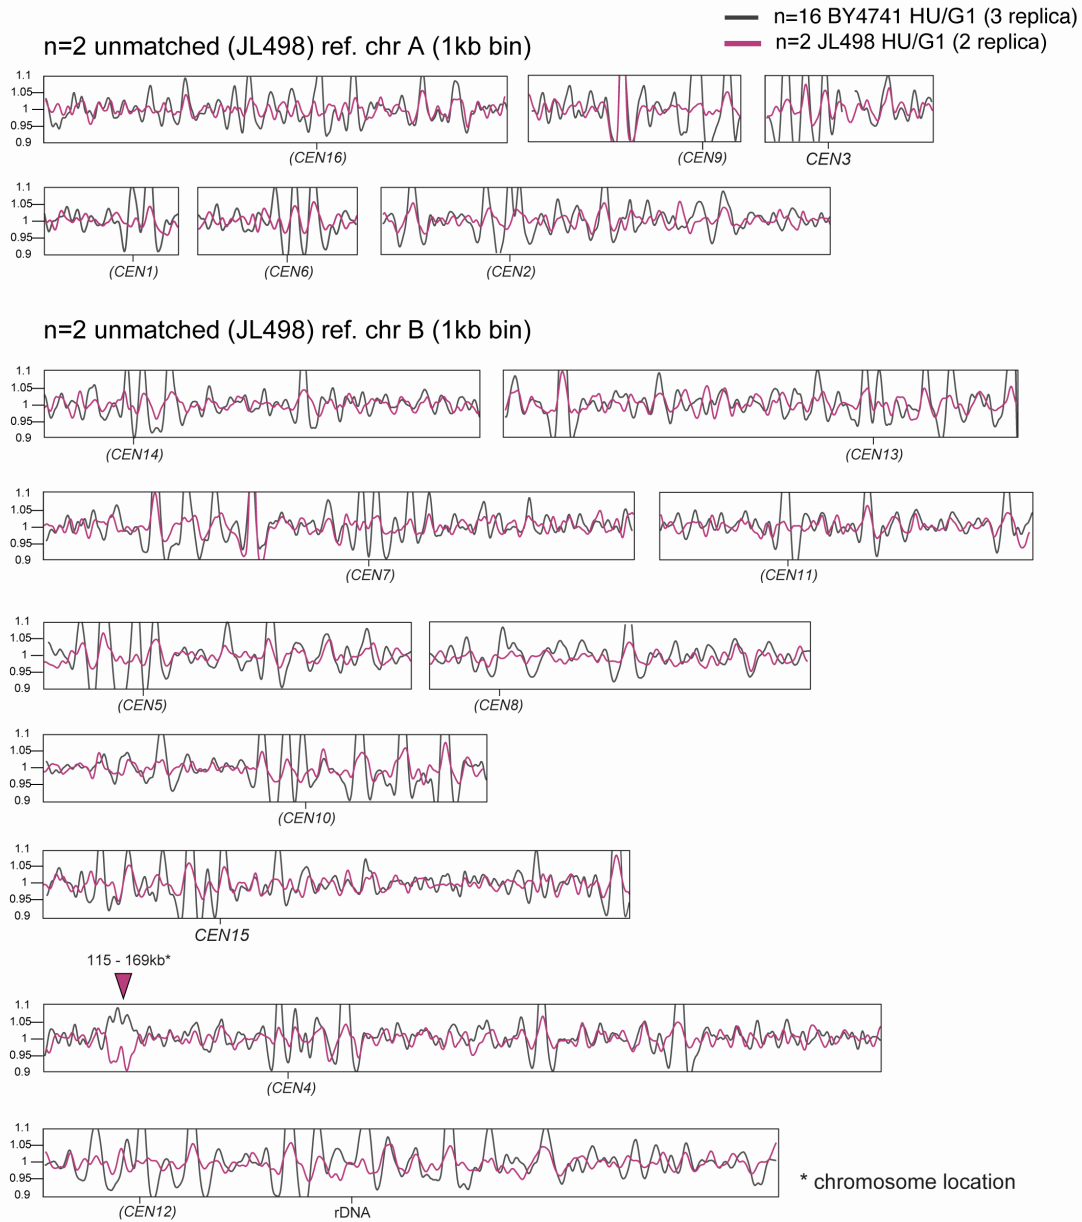

**Figure S13, related to Main Figure 3. Comparison of origin firing profiles in n=2 JL498 vs. n=16 BY4741.**

Notice that origin firing in n=2 JL498 is overall less distinct compared to n=2 JL402, a result of its inefficient synchronization in G1 (see histograms in B). Arrowheads in C and D point at 3 distinct locations where the replication firing differ between n=2 and n=16. Two of them (on former chr7 and chr12) contain repeated Ty-1 elements (LTR retrotransposon) and appear only in the n=2 size-matched strain. Whereas the 3rd (on former chr4) is coherent in both n=2 strains and is located in a region where none of the manually curated replication studies<sup>55,69,70</sup> identified any origin in ~90kb.



Supplemental Figure 14

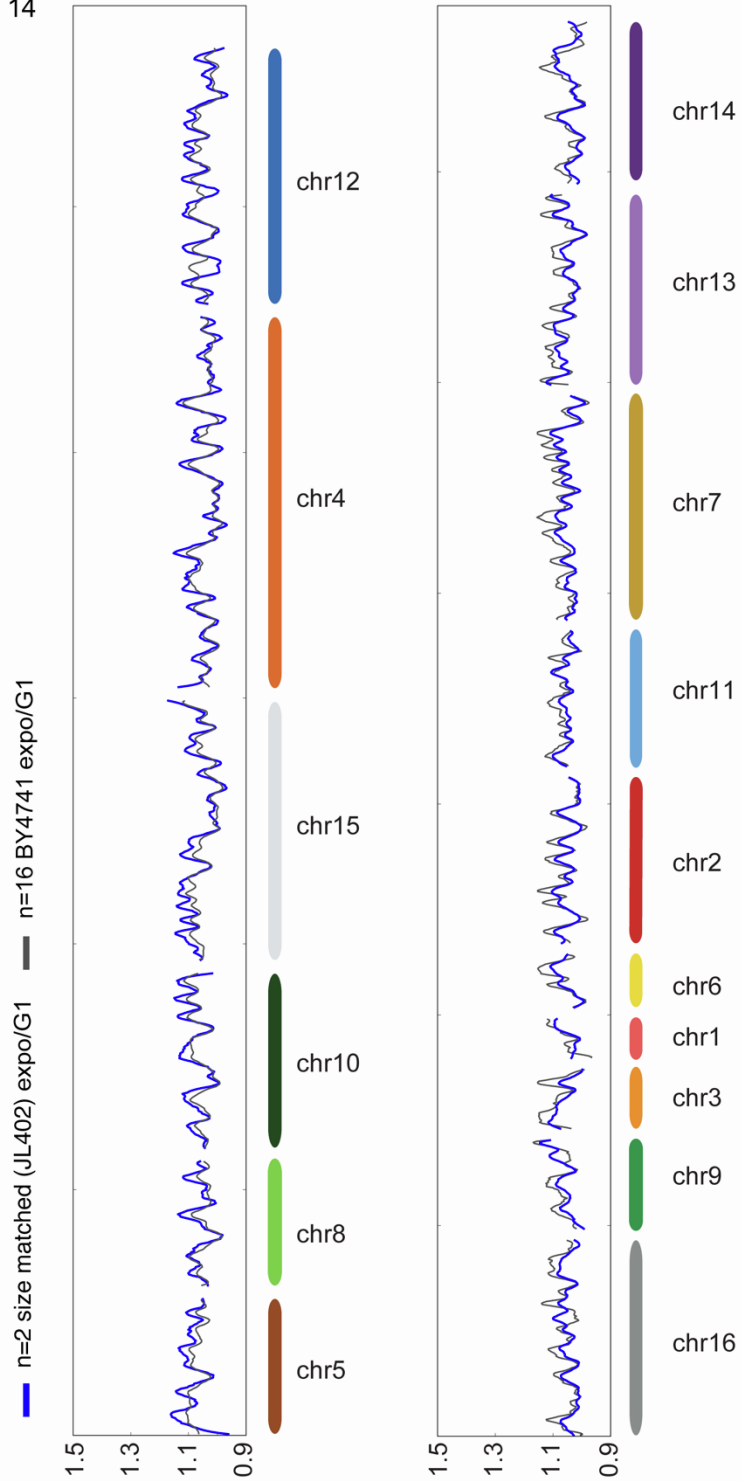

**Figure S14, related to Main Figure 3. Comparison of replication profiles of n=2 JL402 vs. n=16 BY4741.** DNA replication profiles, binned at 5kb, were computed on exponential growing cells normalized on non-replicating G1 profiles.

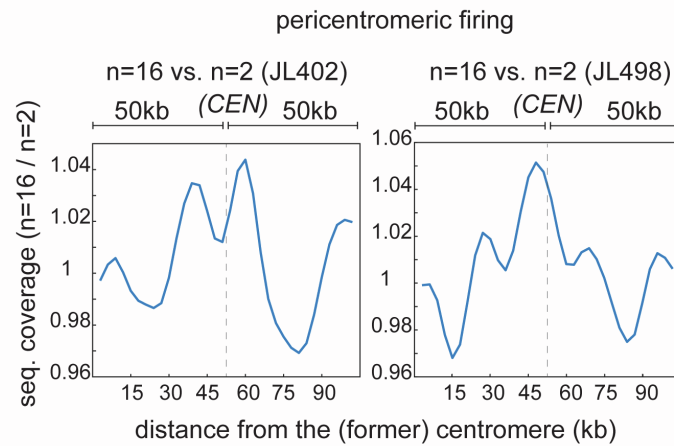

**Figure S15, related to Main Figure 3. Inactivated centromeres fire late during S-phase.**

Pericentromeric firing in n=16 vs. n=2 (JL402 size-matched and JL498 unmatched). Ratio plots show the early firing of pericentromeric regions (~100 kb) in n=16 in respect to n=2, in which centromeres were inactivated. Centromere position is indicated with a dotted line.

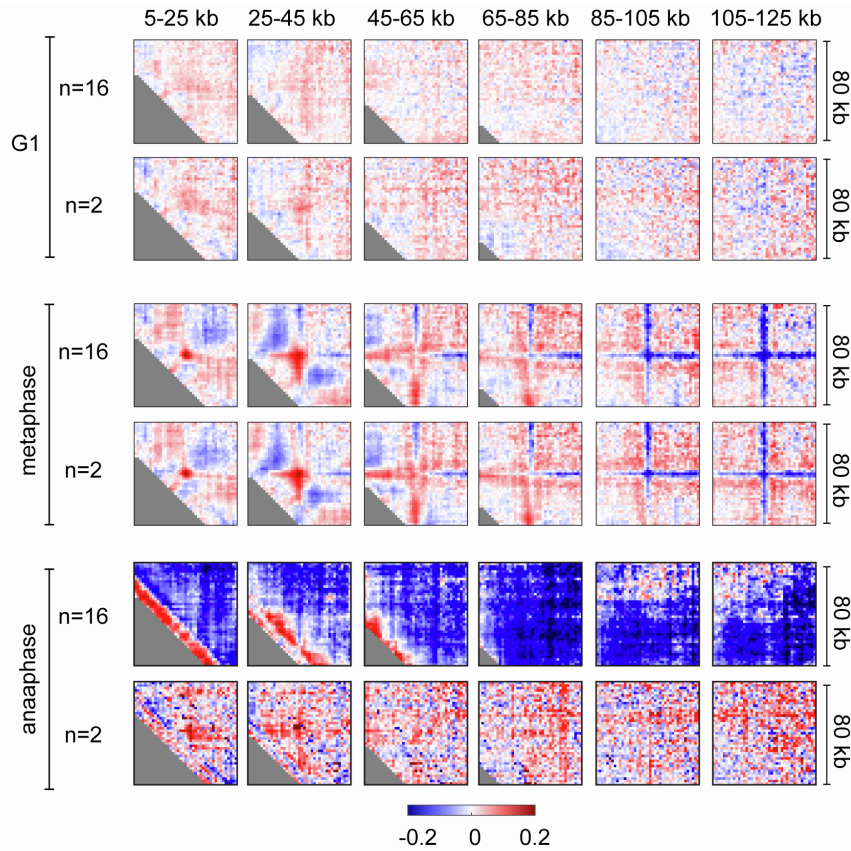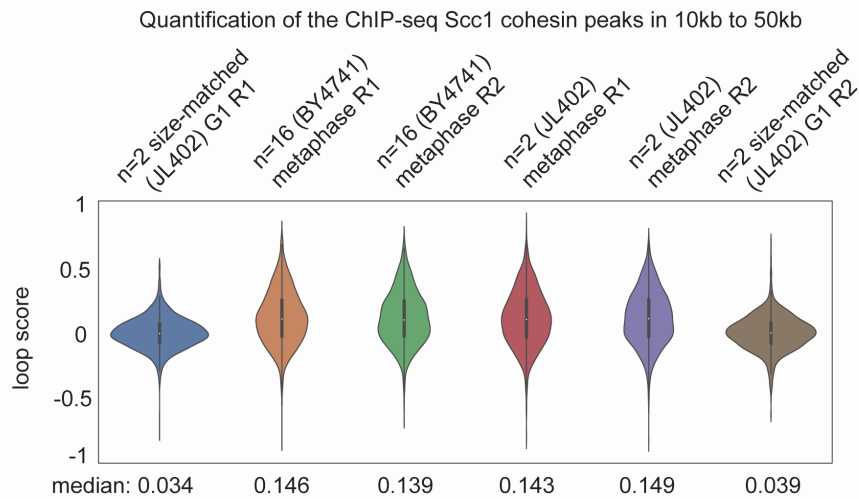

**Figure S16, related to Main Figure 4. Cohesin-dependent reorganization of megachromosomes during cell division.**

Cumulative log-ratio maps of cohesin-dependent contact enrichment as a function of distance from Scc1 *cis* sites during cell cycle progression: G1, metaphase (nocodazole) and anaphase (*cdc15-2 ts*). Blue to red color scale represent an enrichment in contacts dependent on Scc1 in respect to random sites. Violin plots quantify contact enrichment in 10-50 kb windows from Scc1 binding sites in n=16 and n=2 size-matched (JL402).

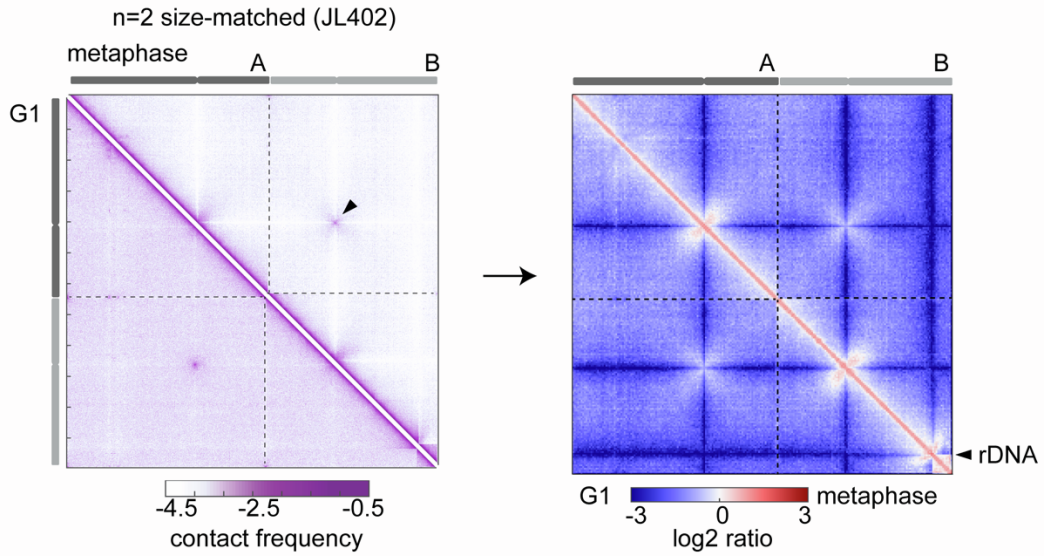

**Figure S17, related to Main Figure 4. Contact comparison maps of n=2 (JL402) cells synchronized in G1 and metaphase.** Blue to red color scale in the log-ratio map reflects contact enrichment in metaphase compared to G1 (50bk-binned; log2). Black arrowheads indicate inter-centromere contacts.

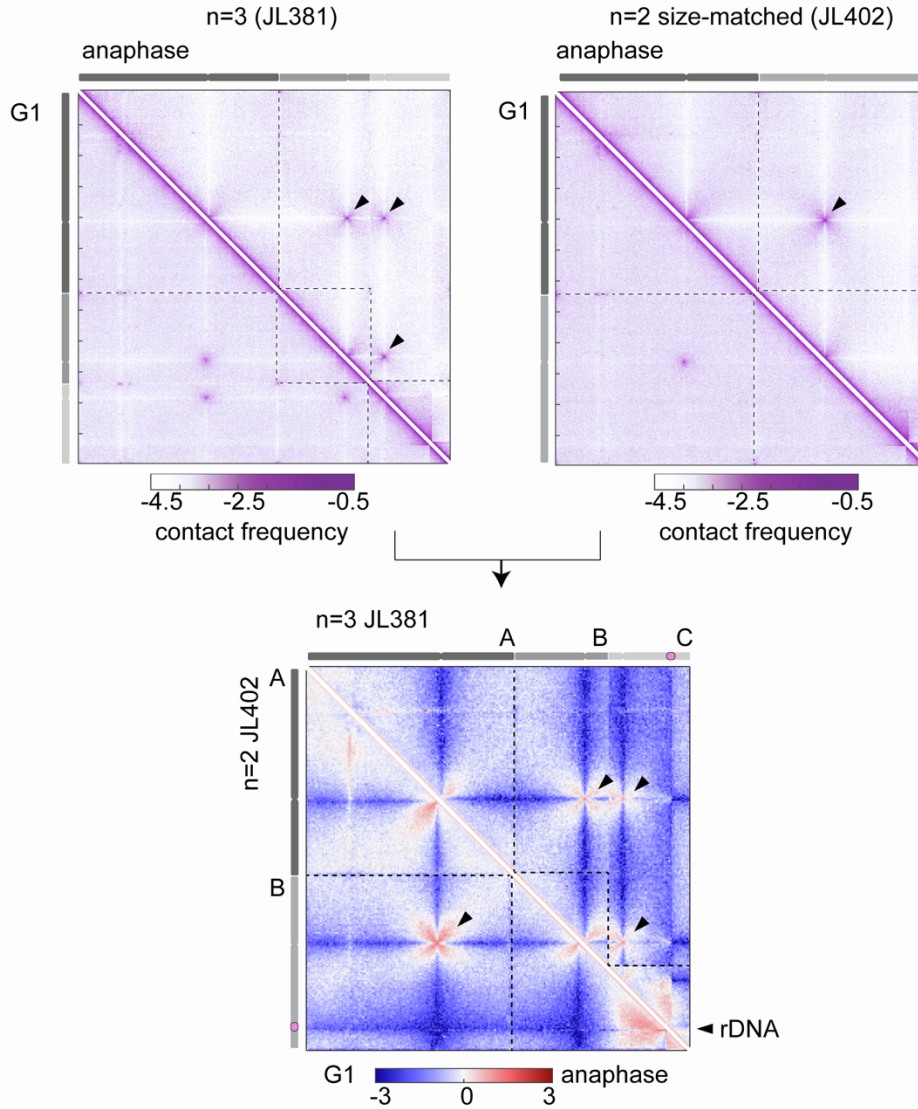

**Figure S18, related to Main Figure 4. Contact comparison maps of either *n=3* (JL381) or *n=2* (JL402) strains synchronized in G1 and anaphase. Blue to red color scale in the log-ratio maps reflects contact enrichment in anaphase compared to G1 (50bk-binned; log<sub>2</sub>). Black arrowheads indicate inter-centromere contacts.**

**Table S6, related to Main Figures 1, 2 and 4. Hi-C libraries.**

| Strain name                              | Karyotype | Synchronization method           | Total paired-end reads | Aligned paired-end reads | Total contacts in map |
|------------------------------------------|-----------|----------------------------------|------------------------|--------------------------|-----------------------|
| BY4741<br>(Lazar-Stefanita et al., 2017) | 16        | none                             | 43649470               | 31761165                 | 17649810              |
| BY4741                                   | 16        | metaphase<br>nocodazole (exp. 1) | 31738518               | 19384914                 | 18264990              |
| BY4741                                   | 16        | metaphase<br>nocodazole (exp. 2) | 27475676               | 17295275                 | 16137114              |
| JL381                                    | 3         | none                             | 47645690               | 36846370                 | 13606005              |
| JL381                                    | 3         | G1 elutriation                   | 71227924               | 47667278                 | 14943151              |
| LS381                                    | 3         | Anaphase <i>cdc15-2</i>          | 32895220               | 23554200                 | 3173547               |
| JL410                                    | 3         | none                             | 69886343               | 55663288                 | 6428681               |
| JL410                                    | 3         | G1 elutriation                   | 33874272               | 18479512                 | 13061046              |
| JL402                                    | 2         | none                             | 31808387               | 24803480                 | 12993017              |
| JL402                                    | 2         | G1 elutriation                   | 33942738               | 26955095                 | 11214102              |
| JL402                                    | 2         | metaphase<br>nocodazole (exp. 1) | 28339485               | 18963164                 | 17441919              |
| JL402                                    | 2         | metaphase<br>nocodazole (exp. 2) | 26207064               | 17208531                 | 16102493              |
| JL402                                    | 2         | Anaphase <i>cdc15-2</i> (exp. 1) | 49078905               | 38115942                 | 13116462              |
| JL402                                    | 2         | Anaphase <i>cdc15-2</i> (exp. 2) | 30859455               | 24679199                 | 9090904               |
| JL498                                    | 2         | none                             | 48557489               | 38575397                 | 13925428              |
